# Supplementary material
Source: publisher figshare collection journal article supplement (https://frontiersin.figshare.com/ndownloader/files/13607315)
Supplement: Supplementary file 1 [file 13607315]

## Sheet: Table 2-Fisheries instruments
Table S2. List of International organizations for fisheries management in European waters and contigous seas, and available fisheries-based measures for marine biodiversity conservation.
Fisheries management bodies	Type	Year of establishment	Management targets	Specific targets	Biodiversity Conservation Measures	Web link
General Fisheries Commission for the Mediterranean (GFCM)	Regional Fisheries Management Organization	1997	Living marine resources and aquaculture	Conservation and sustainable use of living marine resources, and sustainable development of aquaculture in the Mediterranean and in the Black Sea.	Conservation and management of living marine resources; Minimizing impacts of fishing activities on living marine resources and their ecosystems; Adoption of management plans based on an ecosystem approach to fisheries; Establishment of fisheries restricted areas for the protection of vulnerable marine ecosystems; Minimizing and mitigating unwanted interactions between fisheries and marine ecosys…	http://www.fao.org/gfcm/en/
International Commission for the Conservation of Atlantic Tunas (ICCAT)	Regional Fisheries Management Organization	1969	Tunas and tuna-like species	Compiling fishery statistics from all entities fishing for these species, coordination of research, including stock assessment, development of scientific-based stocks management.	Formulation of conservation and management measures relating to tunas and tuna-like fishes of the Atlantic Ocean	http://www.iccat.es/en/
North Atlantic Salmon Conservation Organization (NASCO)	Regional Fisheries Management Organization	1984	Atlantic salmon	Conservation, restoration, enhancement and management of wild Atlantic salmon through international cooperation taking account of the best available scientific information.	Identification and designating priority/key habitats for improvement; Maintaining biodiversity; Taking into account other biological factors affecting the productive capacity of Atlantic salmon populations, including predator-prey intaractions; Protection of the current productive capacity of the existing physical habitat of Atlantic salmon; Restoration the productive capacity of Atlantic salmon …	http://www.nasco.int/
North East Atlantic Fisheries Commission (NEAFC)	Regional Fisheries Management Organization	1980	Fishery resources	Long-term conservation and optimum utilisation of the fishery resources in the Convention Area, providing sustainable economic, environmental and social benefits.	Adoption of conservation and management measures that address the need to minimise harmful impacts on living marine resources and marine ecosystems; Accounting for the need to conserve marine biological diversity; Examination of the overall effects of management policies on the fishery resources and other living marine resources and marine ecosystems; Establishment of closed seasons and of closed…	http://www.neafc.org/
International Council for the Exploration of the Sea (ICES)	Regional Fishery Body	1964 (1902)	Sustainable use of the oceans	Provision of the best available science for decision-makers to make informed choices on the sustainable use of the marine environment and ecosystems.	not applicable	http://www.ices.dk
